# Supplementary material for: Development of machine learning models for predicting non-remission in early RA highlights the robust predictive importance of the RAID score-evidence from the ARCTIC study
Source: Frontiers journal article supplement (doi:10.3389/fmed.2025.1526708), 2025-02-12
Supplement: Data_Sheet_1.pdf [file Data_Sheet_1.pdf]

**Supplementary Table S1. Baseline characteristics in the 222 patients**

|                                     | Median [25th-75th] or category: Number (%)*        | Missing counts (%) |
|-------------------------------------|----------------------------------------------------|--------------------|
| Age, years                          | 53.9 [42.0-62.6]                                   | 0 (0)              |
| Sex*                                | Female: 137 (62%), Male: 85 (38%)                  | 0 (0)              |
| BMI, kg/m <sup>2</sup>              | 25.5 [22.9-28.2]                                   | 2 (0.9)            |
| Smoking*                            | Never: 75 (34%), Ever: 93 (42%), Present: 54 (24%) | 0 (0)              |
| Disease duration, months            | 5.45 [2.8-9.9]                                     | 0 (0)              |
| ACPA*                               | Positive: 182 (82%), Negative: 40 (18%)            | 0 (0)              |
| RF*                                 | Positive: 157 (71%), Negative: 65 (29%)            | 0 (0)              |
| DAS                                 | 3.3 [2.6-4.2]                                      | 0 (0)              |
| RAI                                 | 7.0 [4.0-12.8]                                     | 0 (0)              |
| SJC44                               | 9.5 [4.0-14.8]                                     | 0 (0)              |
| PGA, VAS 0-100mm                    | 49.0 [31.0-69.8]                                   | 0 (0)              |
| PhGA, VAS 0-100mm                   | 36.0 [23.0-55.0]                                   | 1 (0.5)            |
| ESR, mm/h                           | 19.0 [11.0-30.8]                                   | 1 (0.5)            |
| CRP, mg/L                           | 7.0 [3.0-18.0]                                     | 0 (0)              |
| Joint pain, VAS 0-100mm             | 46.5 [29.0-70.0]                                   | 0 (0)              |
| Fatigue, VAS 0-100mm                | 38.0 [14.2-64.8]                                   | 0 (0)              |
| PROMIS-PF                           | 39.6 [32.9- 44.2]                                  | 0 (0)              |
| CDAI                                | 21.2 [14.8-30.9]                                   | 1 (0.5)            |
| SDAI                                | 22.2 [15.7-33.2]                                   | 1 (0.5)            |
| RAID score                          | 4.4 [2.9-6.0]                                      | 2 (0.9)            |
| Methotrexate starting dose, mg/week | 15.0 [15.0-15.0]                                   | 0 (0)              |

Values are median [25<sup>th</sup>-75<sup>th</sup> percentile] unless indicated as number (%) by an asterisk (\*) for categorical characteristics including Sex (male/female), Smoking (never/ever/present), ACPA (positive/negative) and RF (positive/negative). DAS = Disease Activity Score based on ESR, patient global, SJC 44 and Ritchie Articular Index. ACR = American College of Rheumatology, EULAR = The European Alliance of Associations for Rheumatology, Disease duration = Time since patient reported first swollen joint measured as months, PROMIS-PF = Patient-Reported Outcome Measurement Information Score short form v1.0-physical function 20a T-score with a mean of 50 and standard deviation of 10 in a reference population. ACPA = anti-cyclic citrullinated peptide, RF = Rheumatoid Factor, BMI = Body Mass Index, SDAI = Simplified Disease Activity Index, CDAI = Clinical Disease Activity Index, SJC44 = Swollen Joint Count in 44 joints, VAS = Visual Analogue Scale, PGA = Patients Global Assessment of disease activity, PhGA = Physician Global Assessment of disease activity, RAI = Tender joint count (Ritchie Articular Index, score 0-78), ESR = Erythrocyte Sedimentation Rate, CRP = C Reactive Protein, RAID = Rheumatoid Arthritis Impact of Disease.

**Supplementary Table S2. Definition and statistics of predicted clinical outcomes used in the analyses**

| <b>Treatment outcomes</b>                   | <b>Count, Proportion</b> | <b>Definition</b>                                                                                                                                                                                                                                                                              |
|---------------------------------------------|--------------------------|------------------------------------------------------------------------------------------------------------------------------------------------------------------------------------------------------------------------------------------------------------------------------------------------|
| ACR/EULAR Boolean non-remission at 6 months | 143, 64%                 | The patient must comply with all: <ul style="list-style-type: none"> <li>• RAI <math>\leq 1</math></li> <li>• SJC28 <math>\leq 1</math></li> <li>• CRP <math>\leq 1</math> mg/dl</li> <li>• PGA <math>\leq 1</math></li> </ul> in order to achieve ACR/EULAR remission otherwise non-remission |
| SDAI non-remission at 6 months              | 134, 60%                 | SDAI = TJC28 + SJC28 + PGA/10 + PhGA/10 + CRP/10<br>Remission: $\leq 3.3$ Otherwise non-remission                                                                                                                                                                                              |
| CDAI non-remission at 6 months              | 135, 61%                 | CDAI = TJC28 + SJC28 + PGA/10 + PhGA/10<br>Remission: $\leq 2.8$ Otherwise non-remission                                                                                                                                                                                                       |

ACR = American College of Rheumatology, EULAR = The European Alliance of Associations for Rheumatology, SDAI = Simplified Disease Activity Index, CDAI = Clinical Disease Activity Index, RAI= Tender joint count (Ritchie Articular Index, score 0-78), SJC28 = Swollen Joint Count in 28 joints, SJC44 = Swollen Joint Count in 44 joints , CRP = C Reactive Protein, PGA = Patients Global Assessment of disease activity, PhGA = Physician Global Assessment of disease activity, TJC28 = Tender Joint Count in 28 joints.

**Supplementary Table S3: Statistics of characteristics of patients grouped as remission and non-remission based on specified criteria.**

| Characteristics          | ACR/EULAR Boolean non-remission at 6 months |                     | SDAI non-remission at 6 months |                     | CDAI non-remission at 6 months |                     |
|--------------------------|---------------------------------------------|---------------------|--------------------------------|---------------------|--------------------------------|---------------------|
|                          | Remission (36%)                             | Non-remission (64%) | Remission (40%)                | Non-remission (60%) | Remission (39%)                | Non-remission (61%) |
| Age, years               | 51.4 [38.5-63.0]                            | 54.7 [43.5-62.5]    | 52.4 [39.8-61.8]               | 54.9 [44.0-62.7]    | 51.9 [39.6-62.6]               | 55.0 [44.2-62.5]    |
| Sex*                     |                                             |                     |                                |                     |                                |                     |
| -Female                  | 52 (65.8%)                                  | 85 (59.4%)          | 55 (62.5%)                     | 82 (61.2%)          | 55 (63.2%)                     | 82 (60.7%)          |
| -Male                    | 27 (34.2%)                                  | 58 (40.6%)          | 33 (37.5%)                     | 52 (38.8%)          | 32 (36.8%)                     | 53 (39.3%)          |
| BMI, kg/m2               | 24.9 [21.9-27.9]                            | 25.7 [23.5-28.4]    | 25.0 [22.0-27.5]               | 25.7 [23.4-28.6]    | 25.2 [22.0-27.5]               | 25.5 [23.0-28.6]    |
| Smoking*                 |                                             |                     |                                |                     |                                |                     |
| -Never                   | 26 (32.9%)                                  | 49 (34.3%)          | 30 (34.1%)                     | 45 (33.6%)          | 32 (36.8%)                     | 43 (31.9%)          |
| -Ever                    | 32 (40.5%)                                  | 61 (42.7%)          | 34 (38.6%)                     | 59 (44.0%)          | 31 (35.6%)                     | 62 (45.9%)          |
| - Present                | 21 (26.6%)                                  | 33 (23.1%)          | 24 (27.3%)                     | 30 (22.4%)          | 24 (27.6%)                     | 30 (22.2%)          |
| Disease duration, months | 5.4 [3.2-10.7]                              | 5.5 [2.7-9.8]       | 6.1 [3.2-10.9]                 | 5.0 [2.7-9.7]       | 6.1 [3.1-10.7]                 | 5.4 [2.7-9.8]       |
| ACPA*                    |                                             |                     |                                |                     |                                |                     |
| -Positive                | 64 (81.0%)                                  | 118 (82.5%)         | 71 (80.7%)                     | 111 (82.8%)         | 70 (80.5%)                     | 112 (83.0%)         |
| -Negative                | 15 (19.0%)                                  | 25 (17.5%)          | 17 (19.3%)                     | 23 (17.2%)          | 17 (19.5%)                     | 23 (17.0%)          |
| RF*                      |                                             |                     |                                |                     |                                |                     |
| -Positive                | 52 (65.8%)                                  | 105 (73.4%)         | 59 (67.0%)                     | 98 (73.1%)          | 58 (66.7%)                     | 99 (73.3%)          |
| -Negative                | 27 (34.2%)                                  | 38 (26.6%)          | 29 (33.0%)                     | 36 (26.9%)          | 29 (33.3%)                     | 36 (26.7%)          |
| DAS                      | 2.9 [2.3-3.5]                               | 3.6 [2.9-4.5]       | 2.9 [2.3-3.5]                  | 3.7 [2.9-4.5]       | 3.0 [2.3-3.5]                  | 3.6 [2.8-4.5]       |
| RAI                      | 4.0 [2.5-8.0]                               | 8.0 [5.0-15.0]      | 4.5 [3.0-8.0]                  | 9.0 [5.0-14.8]      | 5.0 [3.0-9.0]                  | 8.0 [4.5-14.0]      |
| SJC44                    | 8.0 [4.0-13.0]                              | 10.0 [5.0-15.0]     | 9.0 [4.0-13.0]                 | 10.0 [5.0-15.8]     | 10.0 [4.0-13.5]                | 9.0 [5.0-15.0]      |
| PGA, VAS 0-100mm         | 34.0 [21.0-52.5]                            | 54.0 [37.5-75.0]    | 34.5 [21.8-53.0]               | 55.0 [38.0-76.0]    | 35.0 [21.0-53.0]               | 54.0 [37.5-76.5]    |
| PhGA, VAS 0-100mm        | 30.0 [19.5-42.0]                            | 41.5 [28.0-61.8]    | 31.0 [20.0-42.5]               | 42.5 [27.2-63.5]    | 31.5 [20.0-45.0]               | 41.0 [26.5-60.5]    |
| ESR, mm/h                | 16.5 [11.0-27.0]                            | 21.0 [12.0-33.5]    | 16.0 [10.0-27.0]               | 21.5 [12.2-35.8]    | 17.0 [10.0-27.8]               | 21.0 [12.0-33.5]    |
| CRP, mg/L                | 5.0 [2.4-10.0]                              | 8.9 [4.0-19.0]      | 5.0 [2.9-10.5]                 | 9.0 [4.0-21.8]      | 6.0 [3.0-14.0]                 | 8.0 [4.0-19.0]      |
| Joint pain, VAS 0-100mm  | 33.0 [21.0-50.5]                            | 53.0 [33.0-73.0]    | 34.0 [22.8-51.2]               | 55.0 [33.2-74.0]    | 34.0 [21.0-51.5]               | 55.0 [33.5-74.0]    |
| Fatigue, VAS 0-100mm     | 27.0 [6.5-46.5]                             | 48.0 [24.5-69.0]    | 27.5 [4.0-46.2]                | 49.0 [25.0-69.8]    | 26.0 [3.5-46.0]                | 50.0 [25.0-70.5]    |
| PROMIS-PF                | 43.1 [37.3-47.8]                            | 36.1 [30.5-41.6]    | 42.6 [37.6-46.6]               | 35.3 [30.1-42.1]    | 42.6 [37.3-46.6]               | 35.7 [30.3-42.1]    |
| CDAI                     | 17.3 [9.6-24.2]                             | 24.2 [17.2-34.2]    | 17.4 [10.3-25.2]               | 24.4 [17.2-34.3]    | 17.5 [10.2-26.1]               | 24.2 [16.6-34.1]    |
| SDAI                     | 18.1 [10.0-25.0]                            | 25.9 [17.8-36.5]    | 18.4 [11.4-25.9]               | 26.1 [17.7-36.7]    | 18.8 [11.4-26.6]               | 24.9 [17.4-36.4]    |
| RAID score               | 2.9 [2.0-4.4]                               | 5.3 [3.9-6.6]       | 3.0 [2.0-4.5]                  | 5.3 [4.0-6.7]       | 3.0 [2.0-4.4]                  | 5.3 [4.0-6.8]       |

|                                           |                  |                  |                      |                  |                      |                      |
|-------------------------------------------|------------------|------------------|----------------------|------------------|----------------------|----------------------|
| Methotrexate<br>starting dose,<br>mg/week | 15.0 [15.0-15.0] | 15.0 [15.0-15.0] | 15.0 [15.0-<br>15.0] | 15.0 [15.0-15.0] | 15.0 [15.0-<br>15.0] | 15.0 [15.0-<br>15.0] |
|-------------------------------------------|------------------|------------------|----------------------|------------------|----------------------|----------------------|

---

Baseline clinical characteristics of the included patients are presented for both groups. Continuous variables are reported as the median [25th–75th percentile], whereas categorical variables, marked with an asterisk (\*), are presented as n (percentage).

**Supplementary Table S4: Hyperparameters for grid search strategy to optimize prediction models.**

| Base algorithms        | Hyperparameters for Grid Search                                                                                                                                                                                                                                 |
|------------------------|-----------------------------------------------------------------------------------------------------------------------------------------------------------------------------------------------------------------------------------------------------------------|
| Elastic Net            | <ul style="list-style-type: none"> <li>'C': [0.001, 0.01, 0.1, 0.5, 1, 5, 10, 100]</li> <li>'l1_ratio': [0.001, 0.01, 0.1, 0.3, 0.5, 0.7, 0.9, 0.999],</li> <li>Other hyperparameters: 'penalty': 'elastic net', 'solver': 'saga', 'max_iter': 5000.</li> </ul> |
| Random Forest          | <ul style="list-style-type: none"> <li>'max_depth': [5, 7, 10],</li> <li>'n_estimators': [75, 100, 125, 150]</li> <li>'min_samples_split': [3, 4]</li> <li>'max_features': ['sqrt']</li> </ul>                                                                  |
| Support vector machine | <ul style="list-style-type: none"> <li>'gamma': ['scale', 'auto']</li> <li>'kernel': ['linear', 'poly', 'sigmoid']</li> <li>'C': [0.001, 0.01, 0.1, 0.5, 1, 10]</li> </ul>                                                                                      |

**Supplementary Table S5. Performance evaluation across five trials.**

|                | ACR/EULAR<br>non-Remission | SDAI<br>non-Remission | CDAI<br>non-Remission |
|----------------|----------------------------|-----------------------|-----------------------|
| <b>Trial 1</b> | 0.75(0.08)                 | 0.77(0.02)            | 0.76(0.06)            |
| <b>Trial 2</b> | 0.73(0.06)                 | 0.75(0.12)            | 0.77(0.05)            |
| <b>Trial 3</b> | 0.75(0.03)                 | 0.77(0.04)            | 0.75(0.07)            |
| <b>Trial 4</b> | 0.77(0.07)                 | 0.73(0.05)            | 0.75(0.04)            |
| <b>Trial 5</b> | 0.72(0.11)                 | 0.76(0.04)            | 0.76(0.04)            |

The AUC-ROC metrics for each trial presented as the mean with the standard deviation are displayed.  
AUC-ROC = The area under the receiver operating characteristic curve.

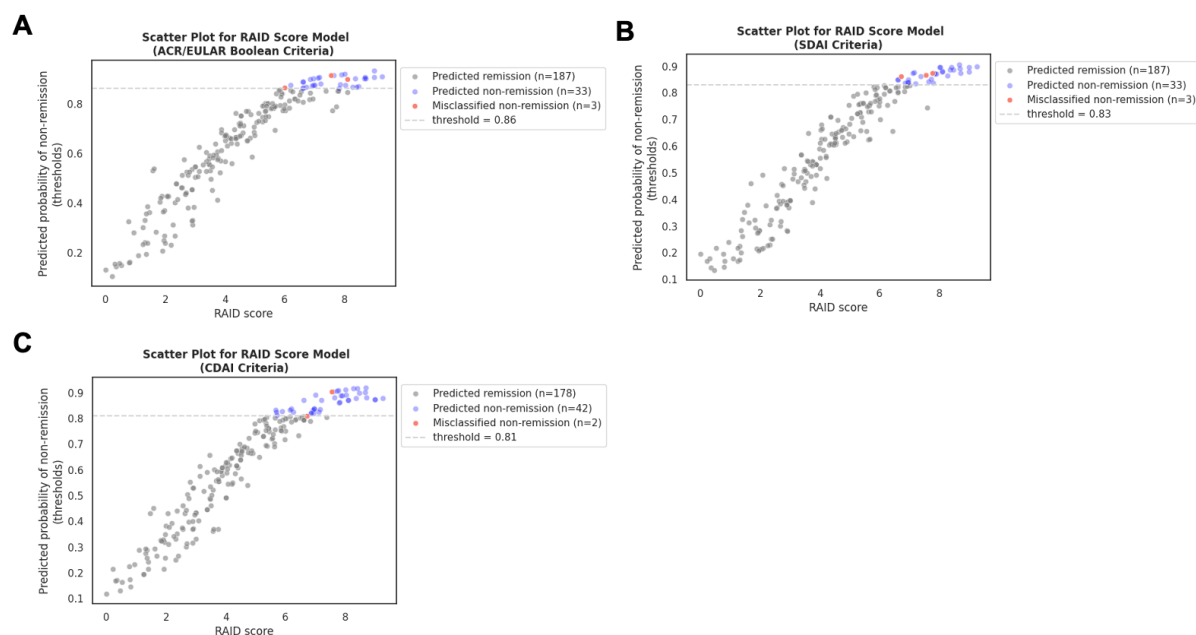

**Supplementary Figure S1: Association between RAID score and predicted probability of non-remission.** The scatter plot illustrates the relationship between RAID score and predicted probabilities of non-remission based on (A) ACR/EULAR Boolean-, (B) SDAI-, (C) CDAI-criteria using a simplified model that exclusively incorporates the RAID score. Strict thresholds of 0.86, 0.83 and 0.81, identified earlier, are shown with a dashed line respective to each criterion. Blue dots represent predicted non-remission, with misclassified non-remission marked in red.

## **Supplementary Data**

### **Supplementary Data S1. Data imputation for missing outcomes of ACR/EULAR-, SDAI, CDAI-remission status.**

Among the 222 patients included in the study, 12 patients had missing outcomes for ACR/EULAR- and CDAI-remission status. On the other hand, SDAI-remission status was missing for 13 patients, and 16 patients had missing outcomes for DAS-based EULAR non-response. To address these missing outcome variables, data imputation was performed using the following rules; for non-remission outcomes at 6 months: non-remission was determined for patients with missing follow-up visits between 6 and 24 months. Remission was determined if the DAS score was  $< 1.2$  and the patient was on methotrexate monotherapy (including standard and optimized doses) at the 4- and 12-month visits. Patients who continued to receive methotrexate monotherapy (including standard and optimized doses) from 12 to 24 months were considered to be in remission.

### **Supplementary Data S2. Hyperparameter tuning using grid search strategy and cross-validation.**

Hyperparameter tuning is a crucial part of model training process. This was conducted on the model development folds, comprising 80% of total dataset, which has been segmented through nested cross-validation. To achieve the optimal hyperparameter of each base model, grid search strategy combined with cross-validation was used to optimize each model's performance. The grid search aimed to maximize the AUC-ROC by evaluating various combinations of hyperparameters (refer to supplementary Table 4), and 5-fold cross-validation within the grid search process was employed to improve the model generalization. Subsequently, models configured with optimal hyperparameters were initialized for super learner modeling.
